# Supplementary material for: Biomimic hybrid polymer networks based on casein and poly(methacrylic acid). Case study: Ni2+removal
Source: Royal Society of Chemistry journal article supplement (doi:10.1039/c5ta08424e), 2016-01-01
Supplement: c5ta08424e1.pdf [file c5ta08424e1.pdf]

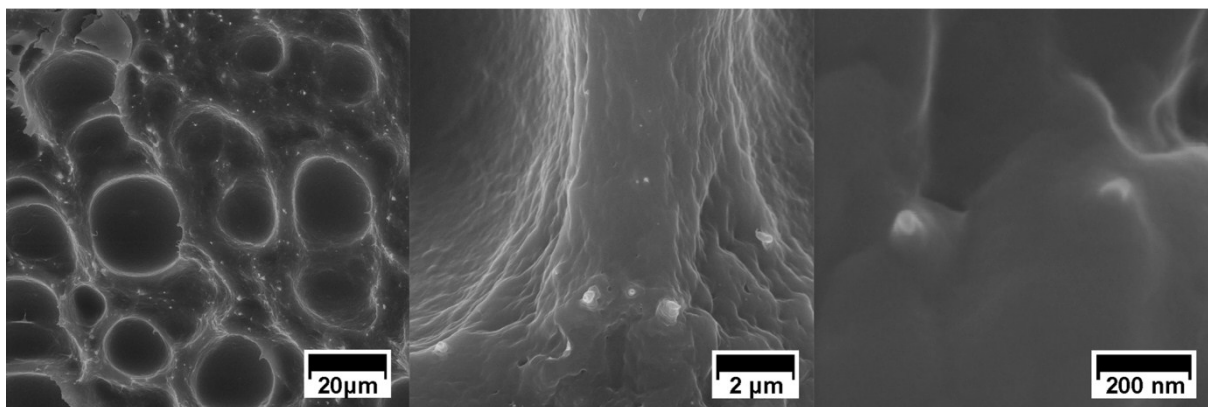

Fig. S1: SEM micrographs of the PMCNa-6 hybrid hydrogel after the sorption of  $\text{Ni}^{2+}$  from the 20 ppm initially concentrated nickel solution.

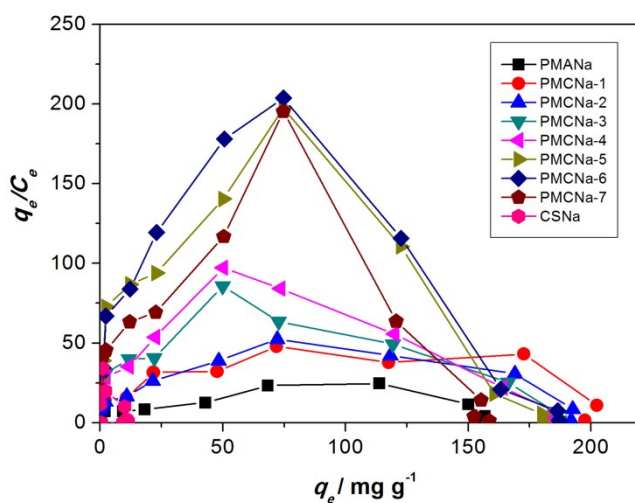

Fig. S2: The Scatchard plots of investigated samples.

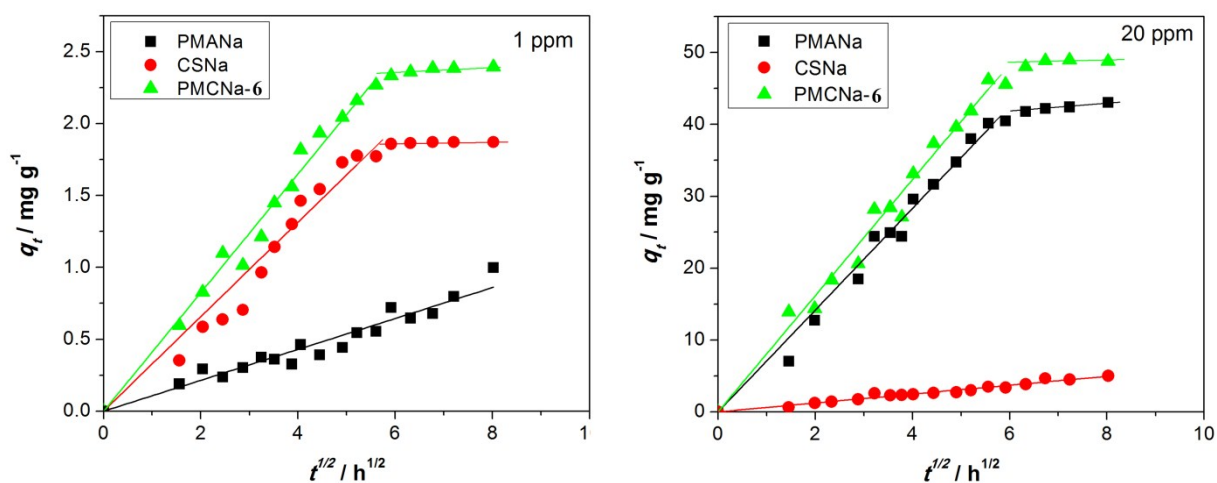

Fig. S3: The dependences  $q_t$  vs.  $t^{1/2}$  for PMANa, CSNa and PMCNa-6.
